# Supplementary material
Source: MDPI journal article supplement (https://www.mdpi.com/2073-431X/12/4/77)
Supplement: s1 [file s1]

## Supplementary Materials

**Table S1.** Composition of samples per variable from Welch's T-tests and ANOVA with repeated measures (rANOVA).

|                              | Gender | Cluster    | n<br>T-Test | n<br>rANOVA | Excluded<br>rANOVA |
|------------------------------|--------|------------|-------------|-------------|--------------------|
| Friendship Quality           | female | Friend     | 31          | 31          | 3                  |
|                              |        | Non-Friend | 26          | 26          | 1                  |
|                              | male   | Friend     | 3           | 3           | 1                  |
|                              |        | Non-Friend | 2           | 2           | 0                  |
|                              | divers | Friend     | 2           | 2           | 0                  |
|                              |        | Non-Friend | 4           | 4           | 0                  |
| Future Usage                 | female | Friend     | 33          | -           | -                  |
|                              |        | Non-Friend | 24          | -           | -                  |
|                              | male   | Friend     | 3           | -           | -                  |
|                              |        | Non-Friend | 2           | -           | -                  |
|                              | divers | Friend     | 2           | -           | -                  |
|                              |        | Non-Friend | 4           | -           | -                  |
| Usage Habits                 | female | Friend     | 33          | -           | -                  |
|                              |        | Non-Friend | 24          | -           | -                  |
|                              | male   | Friend     | 3           | -           | -                  |
|                              |        | Non-Friend | 2           | -           | -                  |
|                              | divers | Friend     | 2           | -           | -                  |
|                              |        | Non-Friend | 4           | -           | -                  |
| Fulfillment of usage motives | female | Friend     | 31          | 29          | 5                  |
|                              |        | Non-Friend | 21          | 20          | 7                  |
|                              | male   | Friend     | 4           | 4           | 0                  |
|                              |        | Non-Friend | 2           | 2           | 0                  |
|                              | divers | Friend     | 2           | 1           | 1                  |
|                              |        | Non-Friend | 3           | 3           | 1                  |
| Fulfillment of user needs    | female | Friend     | 31          | 30          | 4                  |
|                              |        | Non-Friend | 21          | 20          | 7                  |
|                              | male   | Friend     | 4           | 3           | 1                  |
|                              |        | Non-Friend | 2           | 2           | 0                  |
|                              | divers | Friend     | 2           | 2           | 0                  |
|                              |        | Non-Friend | 3           | 3           | 1                  |
| Usage Evaluation             | female | Friend     | 33          | 33          | 1                  |
|                              |        | Non-Friend | 26          | 25          | 2                  |
|                              | male   | Friend     | 3           | 3           | 1                  |

---

|                        |        |            |    |    |   |
|------------------------|--------|------------|----|----|---|
|                        |        | Non-Friend | 2  | 2  | 0 |
|                        | divers | Friend     | 2  | 2  | 0 |
|                        |        | Non-Friend | 4  | 4  | 0 |
| Parasocial Interaction | female | Friend     | 30 | 30 | 4 |
|                        |        | Non-Friend | 23 | 22 | 5 |
|                        | male   | Friend     | 4  | 4  | 0 |
|                        |        | Non-Friend | 2  | 2  | 0 |
|                        | divers | Friend     | 2  | 2  | 0 |
|                        |        | Non-Friend | 3  | 3  | 1 |
| Social Sense           | female | Friend     | 30 | 30 | 4 |
|                        |        | Non-Friend | 23 | 22 | 5 |
|                        | male   | Friend     | 4  | 4  | 0 |
|                        |        | Non-Friend | 2  | 2  | 0 |
|                        | divers | Friend     | 2  | 2  | 0 |
|                        |        | Non-Friend | 3  | 3  | 1 |
| Attachment             | female | Friend     | 34 | 31 | 3 |
|                        |        | Non-Friend | 27 | 26 | 1 |
|                        | male   | Friend     | 4  | 3  | 1 |
|                        |        | Non-Friend | 2  | 2  | 0 |
|                        | divers | Friend     | 2  | 2  | 0 |
|                        |        | Non-Friend | 4  | 4  | 0 |
| Uncanny Valley         | female | Friend     | 33 | 29 | 5 |
|                        |        | Non-Friend | 26 | 24 | 3 |
|                        | male   | Friend     | 3  | 3  | 1 |
|                        |        | Non-Friend | 2  | 2  | 0 |
|                        | divers | Friend     | 2  | 1  | 1 |
|                        |        | Non-Friend | 4  | 4  | 0 |
| Personality            | female | Friend     | 34 | -  | - |
|                        |        | Non-Friend | 27 | -  | - |
|                        | male   | Friend     | 4  | -  | - |
|                        |        | Non-Friend | 2  | -  | - |
|                        | divers | Friend     | 2  | -  | - |
|                        |        | Non-Friend | 3  | -  | - |
| Loneliness             | female | Friend     | 34 | -  | - |
|                        |        | Non-Friend | 27 | -  | - |
|                        | male   | Friend     | 4  | -  | - |

---

|                     |        |            |    |   |   |
|---------------------|--------|------------|----|---|---|
| Attachment Patterns | divers | Non-Friend | 2  | - | - |
|                     |        | Friend     | 2  | - | - |
|                     |        | Non-Friend | 3  | - | - |
|                     | female | Friend     | 34 | - | - |
|                     |        | Non-Friend | 27 | - | - |
|                     | male   | Friend     | 4  | - | - |
|                     |        | Non-Friend | 2  | - | - |
|                     | divers | Friend     | 2  | - | - |
|                     |        | Non-Friend | 3  | - | - |

---

---

**Table S2.** Used and adapted Items of *IFS* for Evaluation of Friendship Quality.

| Subscale                    | Item                                                                                                                                                                                                                                                                                                                |
|-----------------------------|---------------------------------------------------------------------------------------------------------------------------------------------------------------------------------------------------------------------------------------------------------------------------------------------------------------------|
| 1 Frankness and Spontaneity | I can talk to my voice assistant about almost anything.<br>If my voice assistant does something I don't like, I can always tell him.<br>I talk to my voice assistant about my plans and hopes for the future.<br>I also talk to my voice assistant about things I have done that other people would not approve of. |
| 2 Sensitivity and Knowing   | I know how my voice assistant feels about things without it having to tell me.<br>I can tell when my voice assistant is worried about something.                                                                                                                                                                    |
| 3 Attachment                | I feel close to my voice assistant.<br>I like my voice assistant.<br>When my voice assistant is not there, I miss him.                                                                                                                                                                                              |
| 4 Exclusiveness             | The most exciting things happen when I am with my voice assistant and no one else is around.<br>I experience things with my voice assistants that I don't experience with others.<br>It bothers me when others are also using my voice assistant.                                                                   |
| 5 Giving and Sharing        | When something good happens to me, I share the experience with my voice assistant.<br>Whenever my language assistant tells me about a problem, I give it my attention.                                                                                                                                              |
| 6 Trust and Loyalty         | I know that whatever I tell my speech assistant will remain a secret between the two of us.<br>I will not join with others to oppose my voice assistant.<br>When others say something against my voice assistant, I defend it.<br>I tell other people nice things about my voice assistant.                         |

---

**Table S3.** Captured coded functions of the voice assistant with content description and assignment to the individual categories as well as exemplary keywords for automated coding via string matching.

| Categories                   | Functions / Subcategories | Description                                                                                                                                                                | Keywords (German Example)                                                        | Keywords (English Example)                                                  |
|------------------------------|---------------------------|----------------------------------------------------------------------------------------------------------------------------------------------------------------------------|----------------------------------------------------------------------------------|-----------------------------------------------------------------------------|
| <b>Knowledge Acquisition</b> | 1 News                    | The device is used for listening to the news, such as daily world events, Bundesliga results, or horoscopes.                                                               | Nachrichten, was gibt's Neues, Horoskop, Bundesliga                              | News, what's new, horoscope, Bundesliga                                     |
|                              | 2 Knowledge Base          | Asked questions to the device that provides information that expands the user's general knowledge.                                                                         | wie lautet, warum ist, wer hat, warum sind, wer ist der                          | what is, why is, who has, why are, who is the                               |
|                              | 3 Local Guide             | The device is used to find addresses of localities in the vicinity or to find out about their opening hours.                                                               | Öffnungszeiten, in der Nähe, Restaurant                                          | opening hours, near, restaurant                                             |
|                              | 4 Calculator              | The device is used for calculations like a calculator.                                                                                                                     | minus, plus, geteilt, wie viel ist                                               | minus, plus, divided, how much is                                           |
|                              | 5 Weather                 | The device is used to get the weather report, and daily temperature or to check the current or future weather.                                                             | wie ist das Wetter, Wetterbericht, wie warm, wie viel Grad                       | how is the weather, weather forecast, how warm, how many degrees            |
| <b>Support</b>               | 6 Alarm Clock and Time    | The device is used as an alarm clock and clock.                                                                                                                            | stell den Wecker, wie spät, wie viel Uhr                                         | set the alarm, how late, what time                                          |
|                              | 7 Timer                   | The device is used as a timer or stopwatch.                                                                                                                                | Timer, Countdown, wie lange noch, ab jetzt                                       | timer, countdown, how much longer, starting now                             |
|                              | 8 Reminder                | The device is used to be reminded of certain events.                                                                                                                       | Erinnerung, merke, erinnere                                                      | reminder, remember, remember                                                |
|                              | 9 To-Do List              | The device is used to create to-do lists.                                                                                                                                  | todo, To-do, to-do-liste                                                         | todo, to-do, to-do-list                                                     |
|                              | 10 Calendar               | The device is used as both a calendar and an appointment book. This includes, for example, asking for specific calendar days, days of the week, and upcoming appointments. | Termin, Kalender, terminplan                                                     | appointment, calendar, schedule                                             |
|                              | 11 Route Planner          | The device is used for route planning, travel planning, determining travel connections, and querying travel routes.                                                        | wie ist mein Weg, wie weit ist es bis, Reiseverbindung, wie weit ist die Strecke | how is my way, how far is it to, travel connection, how far is the distance |

|                         |    |                           |                                                                                                                                          |                                                                |                                                        |
|-------------------------|----|---------------------------|------------------------------------------------------------------------------------------------------------------------------------------|----------------------------------------------------------------|--------------------------------------------------------|
|                         | 12 | Notes                     | The device will be used to take notes.                                                                                                   | notiere, Notiz                                                 | note,                                                  |
|                         | 13 | Cooking                   | The device is used to call up cooking recipes or cooking ideas.                                                                          | Rezept, Zutat, wie koche ich                                   | recipe, ingredients, how to cook                       |
|                         | 14 | Shopping List             | The device is used for creating shopping lists.                                                                                          | Einkaufsliste                                                  | shopping list                                          |
|                         | 15 | Videostreaming            | The device is used for watching and playing videos and movies.                                                                           | Netflix, ZDF, Mediathek, Fire Tv                               | Netflix, ZDF, Mediathek, Fire Tv                       |
|                         | 16 | Listen to Music           | The device is used for playing or listening to music.                                                                                    | spiele Lied, Musik, Spotify                                    | play song, music, Spotify                              |
| Medial<br>Entertainment | 17 | Audiobooks and<br>Stories | The device is used for listening to stories, podcasts, or audiobooks.                                                                    | Hörbuch, Audible, Geschichte                                   | audiobook, Audible, story                              |
|                         | 18 | Games and Skills          | The device is used for games or playful skills, such as quiz duel.                                                                       | schnick schnack schnuck, Akinator,<br>Quiz Duell               | schnick schnack schnuck,<br>Akinator, Quiz Duel        |
|                         | 19 | Media Control             | The device is used to control the device itself, movies, videos, music, or<br>other media.                                               | zurückspulen, vorspulen, spule vor,<br>an, aus, leiser, lauter | rewind, fast forward, fast<br>forward, on, off, louder |
|                         | 20 | Jokes                     | The device is used to be told jokes or fun facts.                                                                                        | Witz, Joke, fun fact                                           | joke, fun fact                                         |
| Mood<br>Management      | 21 | Motivation                | The device is used to motivate oneself. This can include playing<br>motivational sayings and songs.                                      | Motiviere, Motivation                                          | motivate, motivation                                   |
|                         | 22 | Relaxation                | The device is used to actively relax. This includes the use of relaxing music,<br>meditation, or other relaxation exercises.             | Mediation, entspann                                            | mediation, relax                                       |
|                         | 23 | Sleep aid                 | The device is used to help you fall asleep or to help you fall asleep better<br>(e.g., lullabies).                                       | Schlaf, Schlaflied                                             | sleep, lullaby                                         |
|                         | 24 | Self-esteem               | The device is used to receive compliments or to push self-worth (e.g., Alexa,<br>do you think I'm great?).                               | Findest du mich toll                                           | Do you think I'm great                                 |
|                         | 25 | Negative Mood             | The device is used as an outlet for negative emotions or is sought out in<br>negative affective states (e.g., I'm scared! I'm nervous!). | Ich bin nervös, ich habe angst                                 | I am nervous, I am scared                              |
|                         | 26 | Fun Gadget                | The device is used for one's amusement or otherwise (sometimes absurdly)<br>fun actions (e.g. Alexa, self-destruct!)                     | überrasch, Selbstzerstörung, belle<br>wie ein                  | surprise, self-destruction, bark<br>like one           |

|                        |    |                                      |                                                                                                                                                                                  |                                                                                            |                                                                                                       |
|------------------------|----|--------------------------------------|----------------------------------------------------------------------------------------------------------------------------------------------------------------------------------|--------------------------------------------------------------------------------------------|-------------------------------------------------------------------------------------------------------|
|                        | 27 | Social Presence                      | The device is used to get attention or the feeling of not being alone (e.g. Alexa, are you there? Alexa, talk to me!).                                                           | sprich mit mir, sag was                                                                    | talk to me, say something                                                                             |
| Smart Home             | 28 | Lamps                                | The device is used to control light bulbs and lamps, turn them on, turn them off, etc.                                                                                           | dimme, Licht, warmweiß, Glühbirne, lechter                                                 | dim, light, warm white, bulb                                                                          |
|                        | 29 | Sockets                              | The device is used to control electrical outlets or turn the power on and off.                                                                                                   | Steckdose, Strom, Stecker                                                                  | socket, power, plug                                                                                   |
|                        | 30 | Other Smart Home                     | When the device is used to control or use other smart home devices (e.g. thermostat).                                                                                            | Temperieren, Heizung                                                                       | temper, heating                                                                                       |
|                        | 31 | Connection                           | The device is used to connect to other technologies via Bluetooth.                                                                                                               | bluetooth, verbinde, trenne                                                                | bluetooth, connect, disconnect                                                                        |
| Social Interaction     | 32 | Offense                              | The device is insulted, belittled, or treated in a lewd manner.                                                                                                                  | Fresse, Schnauze, Arsch, halts Maul                                                        | face, shut up, ass, shut up                                                                           |
|                        | 33 | Appreciation                         | When the user compliments or says something nice to the device.                                                                                                                  | Du bist toll, nett, ich liebe dich, freundlich                                             | you are great, nice, I love you, friendly                                                             |
|                        | 34 | Congratulation and Holiday Greetings | When the device is congratulated or receives holiday greetings (e.g., Happy Birthday, Merry Christmas!).                                                                         | Alles Gute zum Geburtstag, frohes Neues, frohe Weihnachten                                 | happy birthday, happy new year, merry christmas,                                                      |
|                        | 35 | Apology                              | When users apologize to the device.                                                                                                                                              | sorry, Entschuldigung, es tut mir leid                                                     | sorry, excuse                                                                                         |
|                        | 36 | Interest in Social Cues              | When users ask the device a question to learn more about the device as a person/social entity (e.g. What are your parent's names? How old are you? What is your favorite color?) | wie alt bist du, wie heißt du, wie findest du, wie verbringst, was ist deine du, magst du, | how old are you, what is your name, how do you find, how do you spend, what is your you, do you like, |
|                        | 37 | Direct Speech                        | When the device is addressed directly as “you” or “your”.                                                                                                                        | du, dir, dein, deine, dich                                                                 | you, your                                                                                             |
|                        | 38 | Greetings and Goodbyes               | When the device is greeted or said goodbye.                                                                                                                                      | Hallo, Tschüss, Gute Nacht, Guten Morgen, Guten Tag                                        | hello, bye, good night, good morning, good day                                                        |
|                        | 39 | Politeness                           | When users say please or thank you to the device.                                                                                                                                | bitte, danke                                                                               | please, thank you                                                                                     |
|                        | 40 | Intimate Expression                  | When users use phrases that begin with or contain I/my/me or have an intimate or personal reference.                                                                             | ich bin, ich brauch, ich fühle, ich glaub, ich denke                                       | I am, I need, I feel, I think, I believe                                                              |
| Independent Categories | 41 | Calls and Voice Messages             | The device is used to make calls, talk to others on the phone, or send voice messages to others.                                                                                 | Anruf, ruf an, rufen, anrufen, auflegen                                                    | call, hang up                                                                                         |

---

|    |                       |                                                                                        |                                                          |                                               |
|----|-----------------------|----------------------------------------------------------------------------------------|----------------------------------------------------------|-----------------------------------------------|
| 42 | Shopping              | The device is used to store on Amazon, check prices, or retrieve product information.  | Einkaufswagen, bestelle, Amazon, jetzt kaufen, Warenkorb | basket, order, Amazon, buy now, shopping cart |
| 43 | Routine               | The device is used to execute routines or composed chains of commands.                 | starte meinen Tag                                        | start my day                                  |
| 44 | Whisper Mode          | The device is put into whisper mode.                                                   | flüster                                                  | whisper                                       |
| 45 | Misunderstood Request | The device misunderstands a user request, cannot execute it, or has processing errors. | not available, nicht verstanden, not applicable          | not available, not understood, not applicable |
|    | No Assignment         | If an assignment based on the category system is not possible.                         |                                                          |                                               |

---
